# Supplementary material
Source: PubMed Central journal article supplement (PMC2963404)
Supplement: supp_M110.146076_Supplementary_fig146076.pdf [file supp_M110.146076_Supplementary_fig146076.pdf]

## SUPPLEMENTARY FIGURE 1

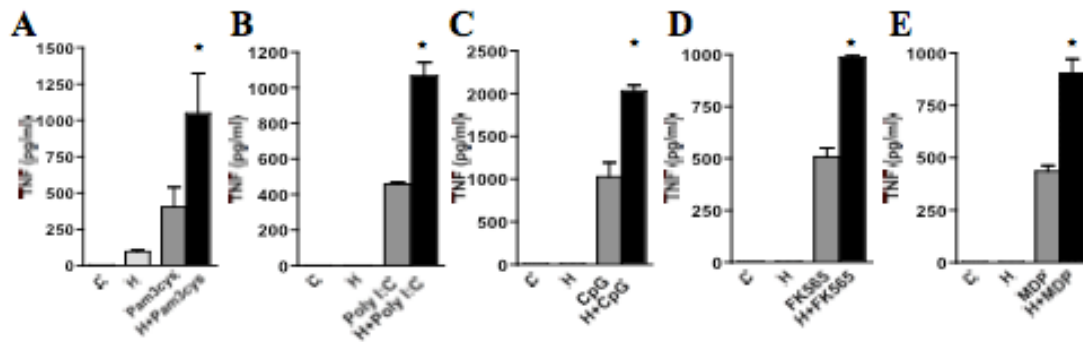

*Heme increases the TNF secretion induced by different agonists of TLRs and NLRs.* Elicited peritoneal macrophages from C57Bl/6 mice were stimulated with heme (100 $\mu$ M) one hour before the stimulation with Pam<sub>3</sub>Cys (0.1ng/ml) (A), Poly (I:C) (10 $\mu$ g/ml) (B), CpG (10 $\mu$ g/ml) (C), FK 565 (10ng/ml) (D) or MDP (10 $\mu$ g/ml) (E). Supernatants were collected 4 hours after the stimuli with TLRs and NLRs ligands and TNF concentrations were evaluated by ELISA. Results represent mean  $\pm$  SEM and are representative of 3 different experiments. \*P<0.05

## SUPPLEMENTARY FIGURE 2

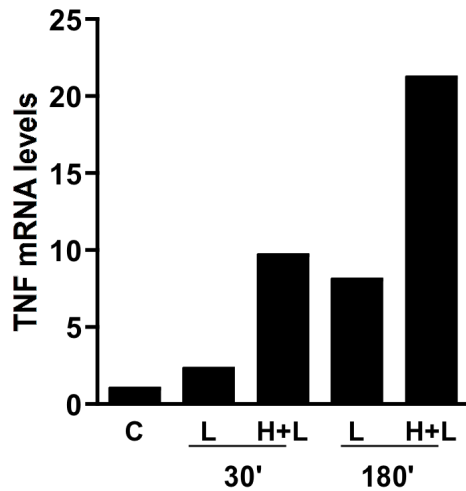

*Heme increases the TNF transcription induced by LPS* - Peritoneal macrophages from C57Bl/6 mice were stimulated with heme (100 $\mu$ M) one hour before the stimulus with LPS (0.1 ng/ml). After 30 or 180 minutes of LPS treatment, macrophages were lysed and RNA prepared with Trizol. Content of mRNA for TNF was determined by real-time RT-PCR. Results were normalized by HPRT expression and are presented as fold induction of mRNA expression relative to control samples.

## SUPPLEMENTARY FIGURE 4

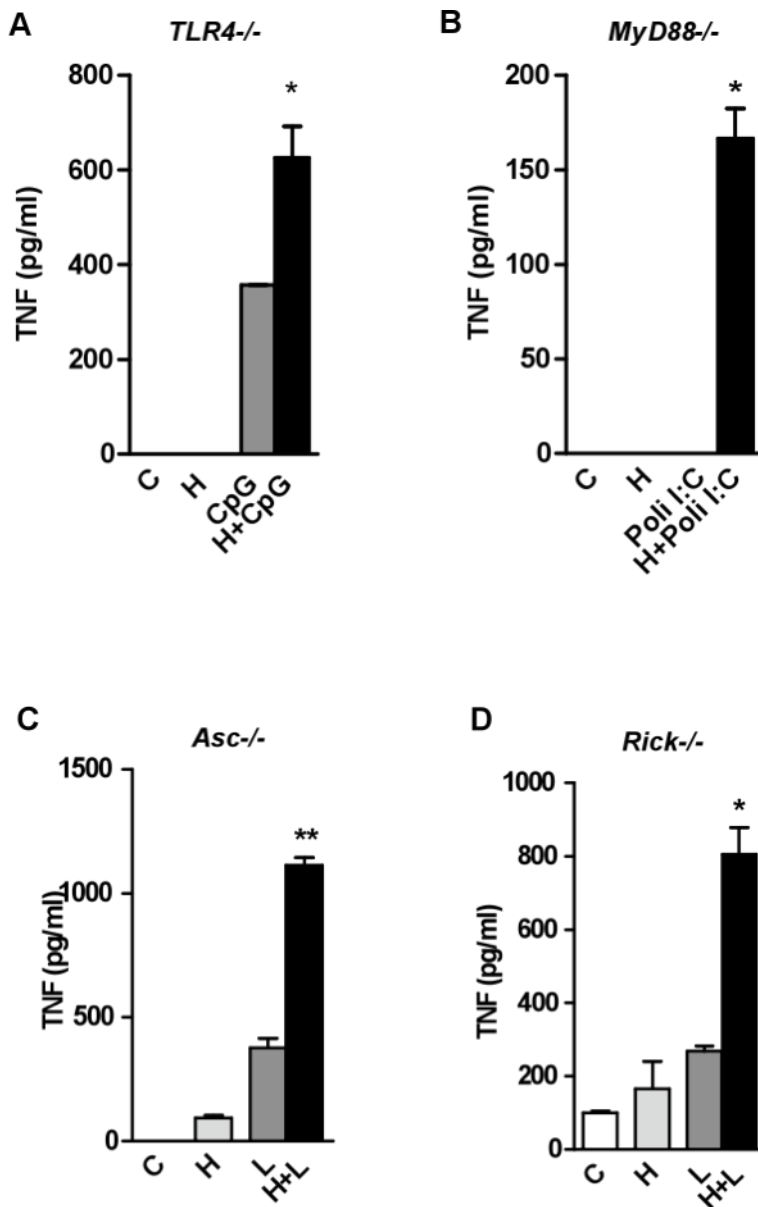

*Heme increases the secretion of TNF induced by agonists of TLRs in the absence of TLR4 MyD88, ASC or RICK.* (A) Elicited peritoneal macrophages were obtained from *Tlr4<sup>-/-</sup>* mice and were stimulated with heme (100 $\mu$ M) one hour before the stimulation with CpG (10 $\mu$ g/ml). Supernatants were collected after 4 hours and TNF concentrations were evaluated by ELISA. Bone marrow-derived macrophages from *Myd88<sup>-/-</sup>* (B), *Asc<sup>-/-</sup>* (C) and *Rick<sup>-/-</sup>* (D) mice were stimulated with heme (100 $\mu$ M) and one hour later were stimulated with Poly (I:C) (10 $\mu$ g/ml) (B) or LPS (C and D). The supernatants were collected 4 hours after Poli (I:C) and LPS stimulus and the TNF concentrations were determined by ELISA. The stimuli were performed in the present of 10%FCS. Results represent mean  $\pm$  SEM for TNF determination and are representatives of 2 different experiments. \*P<0.005 and \*\*P<0.001 compared to stimulus with TLRs ligands alone.

## SUPPLEMENTARY FIGURE 4

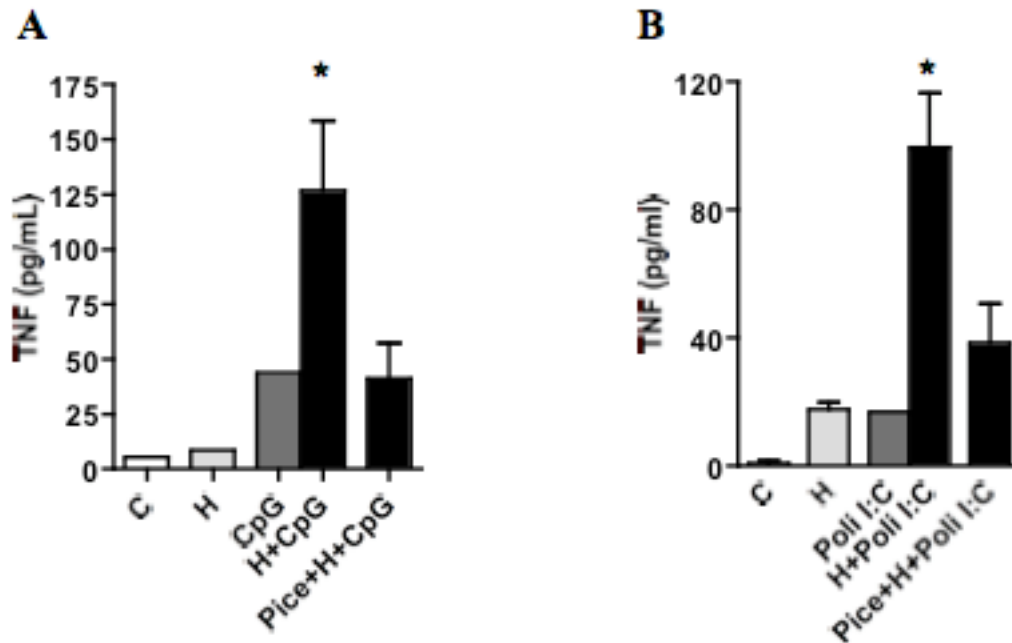

*Syk* is involved in the synergistic effect of heme on cytokine secretion induced by TLR ligands. Peritoneal macrophages from C57Bl/6 were stimulated with heme (100 $\mu$ M) and /or CpG (10 $\mu$ g/ml) (A) or Poli (I:C) (10 $\mu$ g/ml) (B) 30 minutes after the treatment with 10 $\mu$ M of Piceatannol. TNF was quantified by ELISA in supernatants collected 4 hour after de stimuli with heme and LPS. The stimuli were performed in the presence of 10% FCS. Results represent mean  $\pm$  SEM for cytokines determination and are representative of 2 different experiments. \*P<0.05
